# Supplementary material for: The Chick Chorioallantoic Membrane Model: A New In Vivo Tool to Evaluate Breast Cancer Stem Cell Activity
Source: PubMed Central journal article supplement (PMC7795925; doi:10.3390/ijms22010334), 2020-12-30

## **Supplementary data**

**The Chick Chorioallantoic  
membrane model: a new *in vivo*  
tool to evaluate cancer stem cell  
activity**





Supplementary Figure 1. CAM and mice xenographs images at lower magnification (10x)

231

231.LM2

231.BoM

231.BRMS

Mice - H&E - CAM

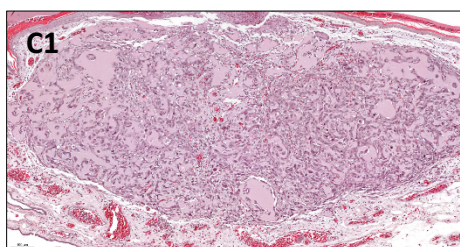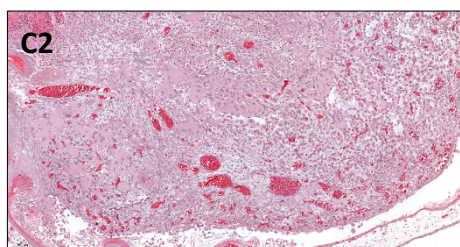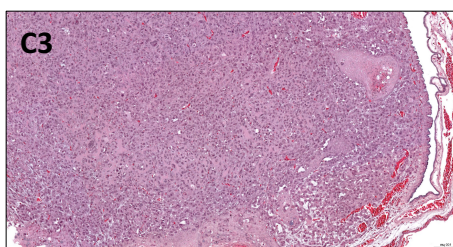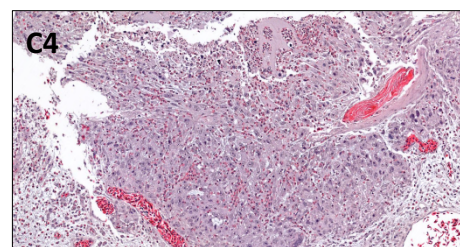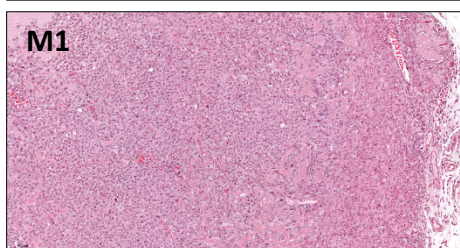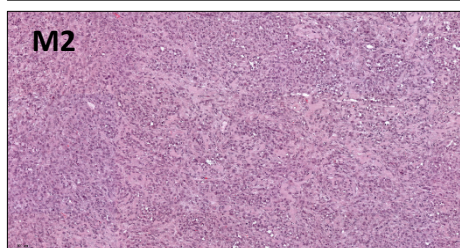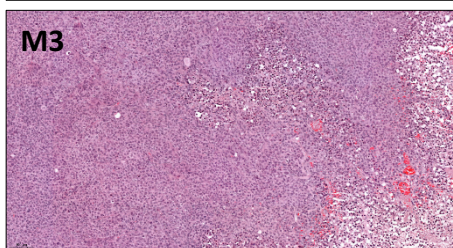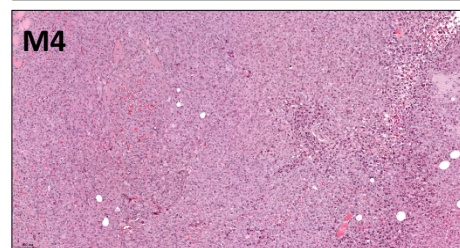

Mice - CD44 - CAM

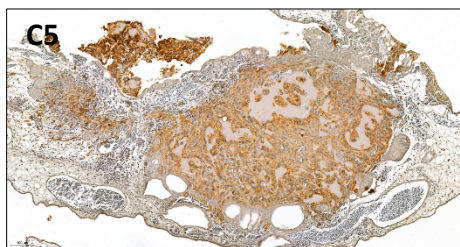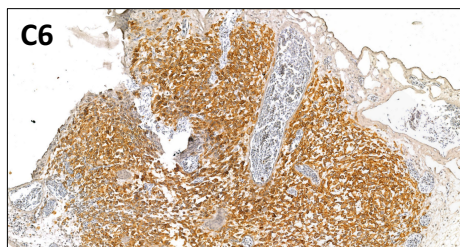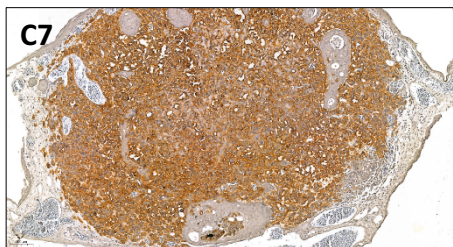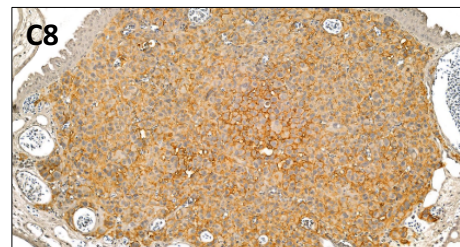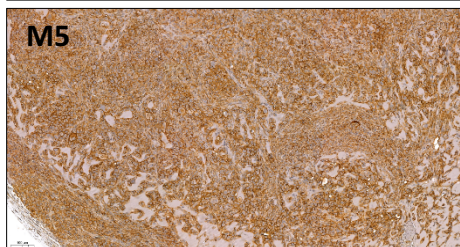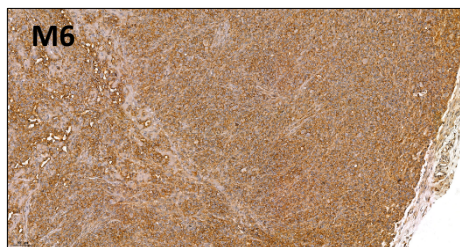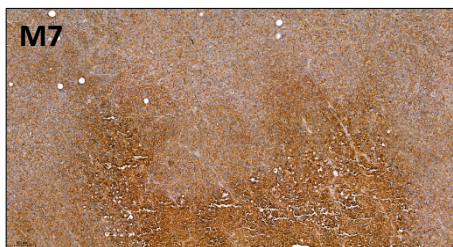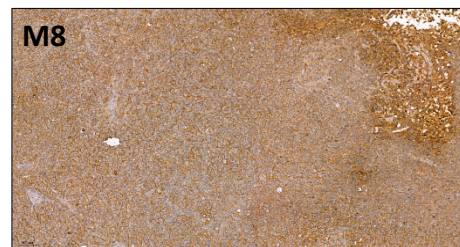

Mice - CD49f - CAM

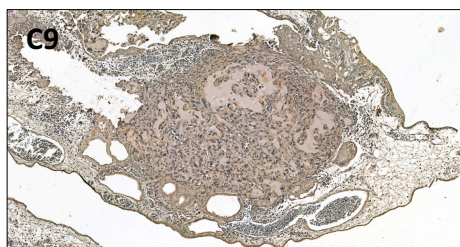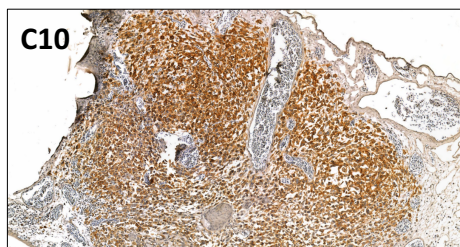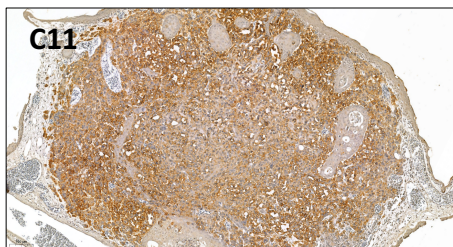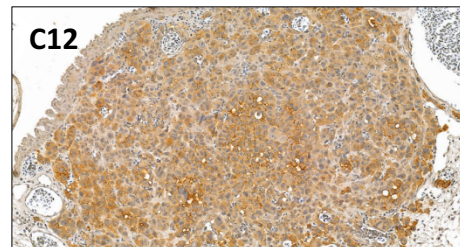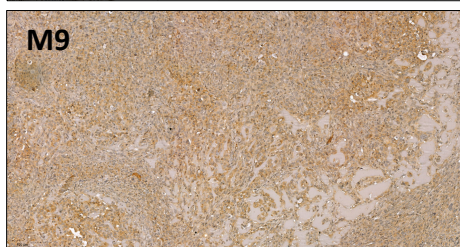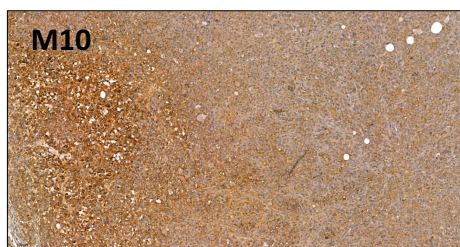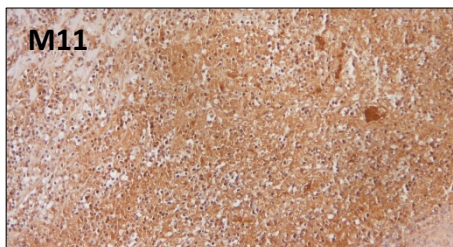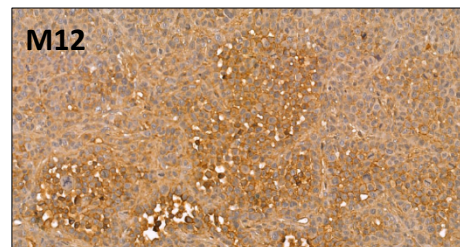

Supplement: ijms-22-00334-s001.pdf [file ijms-22-00334-s001.pdf]
